# Supplementary material
Source: PubMed Central journal article supplement (PMC6072008)
Supplement: EHP1955.s001.acco.pdf [file EHP1955.s001.acco.pdf]

**Note to readers with disabilities:** *EHP* strives to ensure that all journal content is accessible to all readers. However, some figures and Supplemental Material published in *EHP* articles may not conform to [508 standards](#) due to the complexity of the information being presented. If you need assistance accessing journal content, please contact [ehp508@niehs.nih.gov](mailto:ehp508@niehs.nih.gov). Our staff will work with you to assess and meet your accessibility needs within 3 working days.

### **Supplemental Material**

#### **Prenatal Mancozeb Exposure, Excess Manganese, and Neurodevelopment at One Year of Age in the Infants' Environmental Health (ISA) Study**

Ana María Mora, Leonel Córdoba, Juan Camilo Cano, David Hernandez-Bonilla, Larissa Pardo, Lourdes Schnaas, Donald R. Smith, José A. Menezes-Filho, Donna Mergler, Christian H. Lindh, Brenda Eskenazi, and Berna van Wendel de Joode

#### **Table of Contents**

**Table S1.** Distribution of prenatal biomarkers of exposure and child neurodevelopmental outcomes stratified by child sex, ISA study.

**Table S2.** Adjusted associations of prenatal logETU<sub>SG</sub> (µg/L), logMnH (µg/g), and MnB (µg/L) concentrations with BSID-III composite scores at 1 year of age for all children, stratified by child sex and with **interaction terms between exposures** (all exposures in the same model), ISA study.

**Table S3.** Adjusted associations of prenatal logETU<sub>SG</sub> (µg/L), logMnH (µg/g), and MnB (µg/L) concentrations with BSID-III standardized composite scores at 1 year of age for all children and stratified by child sex (models simultaneously adjusted for all three biomarkers), **using complete cases only**, ISA study.

**Table S4.** Adjusted associations of prenatal logETU<sub>SG</sub> (µg/L), logMnH (µg/g), and MnB (µg/L) concentrations with BSID-III composite scores at 1 year of age for all children and stratified by child sex (exposures in **separate models**), ISA study.

**Table S5.** Adjusted associations of prenatal logETU<sub>SG</sub> (µg/L), logMnH (µg/g), and MnB (µg/L) concentrations with BSID-III subtest **z-scores** at 1 year of age for all children and stratified by child sex (all exposures in the same model), ISA study.

**Table S6.** Adjusted associations of prenatal logETU<sub>SG</sub> (µg/L), logMnH (µg/g), MnB (µg/L) concentrations during the **second** half of pregnancy with BSID-III composite scores at 1 year of age stratified by child sex (all exposures in the same model), ISA study.

**Table S7.** Adjusted associations of prenatal logETU<sub>SG</sub> (µg/L), logMnH (µg/g), and MnB (µg/L) concentrations during the **first** half of pregnancy with BSID-III composite scores at 1 year of age for all children and stratified by child sex (all exposures in the same model), ISA study.

**Table S8.** Adjusted associations of prenatal logETU<sub>SG</sub> (µg/L), logMnH (µg/g), and MnB (µg/L) concentrations with BSID-III standardized composite scores at 1 year of age for all children and stratified by child sex (all exposures in the same model), **with additional adjustment for prenatal lead concentrations**, ISA study.

**Figure S1.** Smoothed associations of prenatal mancozeb exposure and excess Mn with child neurodevelopment. Generalized additive models were fit using penalized splines with smoothing parameters estimated by generalized cross-validation [*gam()* function in the R package *mgcv*]. Models were stratified by child sex, and adjusted simultaneously for prenatal log<sub>10</sub>-transformed and specific-gravity adjusted urinary ETU, log<sub>10</sub>-transformed hair Mn, blood Mn concentrations, maternal education, parity, gestational age at birth, and child age, HOME score, and location of assessment at 1-year visit. (A) Prenatal blood manganese; (B) prenatal log<sub>10</sub>-transformed hair Mn; (C) prenatal log<sub>10</sub>-transformed and specific-gravity adjusted urinary ETU. *p*-values correspond to smoothed splines (i.e., exposure-outcome associations). *Abbreviations:* edf, estimated degrees of freedom; ETU, ethylenethiourea; Mn, manganese.

**Figure S2.** Adjusted associations of prenatal mancozeb exposure and excess Mn during pregnancy and by halves of pregnancy with child neurodevelopment. Models were stratified by child sex and adjusted simultaneously for prenatal log<sub>10</sub>-transformed and specific-gravity adjusted urinary ETU, log<sub>10</sub>-transformed hair Mn, blood Mn concentrations, maternal education, parity, gestational age at birth, and child age, HOME score, and location of assessment at 1-year visit. (A) Prenatal log<sub>10</sub> urinary ETU with cognitive composite scores; (B) prenatal log<sub>10</sub> urinary ETU with socio-emotional composite scores; (C) prenatal log<sub>10</sub>-transformed hair Mn with cognitive composite scores; and (D) prenatal log<sub>10</sub>-transformed hair Mn with socio-emotional composite scores. *Abbreviations:* ETU, ethylenethiourea; Mn, manganese.

**Table S1.** Distribution of prenatal biomarkers of exposure and child neurodevelopmental outcomes stratified by child sex, ISA study.

| Exposures and outcomes                                | Boys     |                                  | Girls    |                                  | <i>p</i> -value <sup>a</sup> |
|-------------------------------------------------------|----------|----------------------------------|----------|----------------------------------|------------------------------|
|                                                       | <i>n</i> | Median (P25-P75)<br>or mean ± SD | <i>n</i> | Median (P25-P75)<br>or mean ± SD |                              |
| <b><i>Prenatal biomarkers of exposure</i></b>         |          |                                  |          |                                  |                              |
| Urinary ETU <sub>SG</sub> (µg/L)                      | 178      | 3.3 (2.4-4.9)                    | 177      | 3.5 (2.4-4.9)                    | 0.70                         |
| Hair Mn (µg/g)                                        | 178      | 1.8 (1.0-4.2)                    | 177      | 1.7 (0.9-3.7)                    | 0.42                         |
| Blood Mn (µg/L)                                       | 174      | 23.6 (19.2-27.7)                 | 175      | 24.3 (21.2-28.6)                 | 0.15                         |
| <b><i>Neurodevelopmental outcomes<sup>b</sup></i></b> |          |                                  |          |                                  |                              |
| <i>BSID-III composite scores</i>                      |          |                                  |          |                                  |                              |
| Cognitive                                             | 178      | 98.2 ± 9.4                       | 177      | 98.3 ± 9.7                       | 0.94                         |
| Language                                              | 173      | 88.6 ± 6.8                       | 173      | 91.7 ± 7.1                       | <0.01                        |
| Motor                                                 | 166      | 96.6 ± 8.5                       | 172      | 98.0 ± 9.2                       | 0.15                         |
| Social-emotional                                      | 177      | 88.8 ± 11.6                      | 175      | 91.7 ± 12.2                      | 0.02                         |
| <i>BSID-III z-scores</i>                              |          |                                  |          |                                  |                              |
| Cognitive                                             | 178      | -0.04 ± 1.02                     | 177      | 0.04 ± 0.98                      | 0.49                         |
| Receptive language                                    | 175      | -0.19 ± 1.01                     | 174      | 0.19 ± 0.96                      | <0.01                        |
| Expressive language                                   | 173      | -0.20 ± 1.04                     | 173      | 0.20 ± 0.92                      | <0.01                        |
| Fine motor                                            | 166      | -0.14 ± 1.00                     | 173      | 0.14 ± 0.99                      | 0.01                         |
| Gross motor                                           | 177      | 0.00 ± 1.00                      | 175      | 0.00 ± 1.00                      | 0.95                         |
| Social-emotional                                      | 177      | -0.08 ± 0.98                     | 175      | 0.09 ± 1.02                      | 0.12                         |

*Abbreviations:* *n*, number of children; ETU<sub>SG</sub>, specific-gravity adjusted ethylenethiourea; Mn, manganese; BSID-III, Bayley Scales of Infant and Toddler Development, Third Edition.

<sup>a</sup>*p*-values are for Kruskal-Wallis tests or t-tests comparing boys and girls.<sup>[11]</sup>

<sup>b</sup>Not all 355 infants were administered all four BSID scales. For example, only 346 infants were administered the language scale, whereas only 338 were administered the motor scale.

**Table S2.** Adjusted associations of prenatal logETU<sub>SG</sub> (µg/L), logMnH (µg/g), and MnB (µg/L) concentrations with BSID-III composite scores at 1 year of age for all children, stratified by child sex and with **interaction terms between exposures** (all exposures in the same model), ISA study.

| Neurodevelopmental outcomes  | All children |                    | Boys     |                    | Girls    |                    |
|------------------------------|--------------|--------------------|----------|--------------------|----------|--------------------|
|                              | <i>n</i>     | $\beta$ (95% CI)   | <i>n</i> | $\beta$ (95% CI)   | <i>n</i> | $\beta$ (95% CI)   |
| <i>Cognitive</i>             |              |                    |          |                    |          |                    |
| LogETU <sub>SG</sub>         | 349          | 7.9 (-7.0, 22.7)   | 174      | -1.3 (-21.9, 19.3) | 175      | 15.0 (-10.6, 40.6) |
| LogMnH                       | 349          | 0.0 (-5.0, 5.1)    | 174      | -0.9 (-8.4, 6.6)   | 175      | 1.2 (-6.0, 8.4)    |
| MnB                          | 349          | 0.3 (-0.1, 0.6)    | 174      | 0.2 (-0.2, 0.6)    | 175      | 0.3 (-0.3, 0.9)    |
| LogETU <sub>SG</sub> *LogMnH | 349          | -0.6 (-8.9, 7.7)   | 174      | 5.8 (-6.1, 17.8)   | 175      | -8.1 (-20.5, 4.3)  |
| <i>p</i> <sub>INT</sub>      |              | 0.89               |          | 0.33               |          | 0.20               |
| LogETU <sub>SG</sub> *MnB    | 349          | -0.4 (-1.0, 0.2)   | 174      | -0.1 (-1.0, 0.7)   | 175      | -0.6 (-1.6, 0.5)   |
| <i>p</i> <sub>INT</sub>      |              | 0.21               |          | 0.77               |          | 0.28               |
| <i>Language</i>              |              |                    |          |                    |          |                    |
| LogETU <sub>SG</sub>         | 340          | -0.3 (-12.2, 11.5) | 169      | -1.0 (-17.4, 15.4) | 171      | 5.7 (-14.4, 25.8)  |
| LogMnH                       | 340          | 1.5 (-2.5, 5.5)    | 169      | 0.2 (-5.7, 6.2)    | 171      | 3.1 (-2.5, 8.7)    |
| MnB                          | 340          | 0.0 (-0.3, 0.3)    | 169      | 0.0 (-0.4, 0.3)    | 171      | 0.2 (-0.3, 0.7)    |
| LogETU <sub>SG</sub> *LogMnH | 340          | -2.7 (-9.2, 3.9)   | 169      | 0.9 (-8.6, 10.4)   | 171      | -6.9 (-16.4, 2.6)  |
| <i>p</i> <sub>INT</sub>      |              | 0.43               |          | 0.85               |          | 0.16               |
| LogETU <sub>SG</sub> *MnB    | 340          | 0.0 (-0.4, 0.5)    | 169      | 0.0 (-0.7, 0.6)    | 171      | -0.1 (-0.9, 0.7)   |
| <i>p</i> <sub>INT</sub>      |              | 0.90               |          | 0.94               |          | 0.72               |
| <i>Motor</i>                 |              |                    |          |                    |          |                    |
| LogETU <sub>SG</sub>         | 332          | 7.2 (-8.2, 22.5)   | 162      | 5.9 (-15.4, 27.3)  | 170      | 1.5 (-25.7, 28.7)  |
| LogMnH                       | 332          | 0.1 (-5.2, 5.3)    | 162      | -3.1 (-10.9, 4.7)  | 170      | 3.5 (-4.1, 11.1)   |
| MnB                          | 332          | 0.2 (-0.2, 0.5)    | 162      | 0.2 (-0.2, 0.7)    | 170      | 0.0 (-0.6, 0.7)    |
| LogETU <sub>SG</sub> *LogMnH | 332          | 0.8 (-7.8, 9.4)    | 162      | 5.8 (-6.7, 18.2)   | 170      | -4.0 (-16.9, 8.9)  |
| <i>p</i> <sub>INT</sub>      |              | 0.86               |          | 0.36               |          | 0.54               |
| LogETU <sub>SG</sub> *MnB    | 332          | -0.3 (-0.9, 0.3)   | 162      | -0.3 (-1.2, 0.5)   | 170      | -0.1 (-1.2, 1.0)   |
| <i>p</i> <sub>INT</sub>      |              | 0.29               |          | 0.47               |          | 0.84               |
| <i>Socio-emotional</i>       |              |                    |          |                    |          |                    |
| LogETU <sub>SG</sub>         | 346          | 11.3 (-8.3, 30.9)  | 173      | 12.0 (-15.5, 39.4) | 173      | 11.9 (-22.0, 45.8) |
| LogMnH                       | 346          | -0.1 (-6.7, 6.6)   | 173      | -2.1 (-12.0, 7.9)  | 173      | 1.0 (-8.6, 10.6)   |
| MnB                          | 346          | 0.4 (0.0, 0.9)     | 173      | 0.3 (-0.3, 0.9)    | 173      | 0.5 (-0.3, 1.3)    |
| LogETU <sub>SG</sub> *LogMnH | 346          | -4.2 (-15.1, 6.8)  | 173      | -4.5 (-20.4, 11.3) | 173      | -2.4 (-18.8, 14.0) |
| <i>p</i> <sub>INT</sub>      |              | 0.45               |          | 0.57               |          | 0.77               |
| LogETU <sub>SG</sub> *MnB    | 346          | -0.6 (-1.4, 0.2)   | 173      | -0.5 (-1.6, 0.6)   | 173      | -0.8 (-2.1, 0.6)   |
| <i>p</i> <sub>INT</sub>      |              | 0.14               |          | 0.40               |          | 0.27               |

Models were adjusted for maternal education, parity, gestational age at birth, and child age, HOME score, and location of assessment at 1-year visit.

*Abbreviations:* *n*, number of participants; LogETU<sub>SG</sub>, log<sub>10</sub>-transformed and specific-gravity adjusted urinary ethylenethiourea; LogMnH, log<sub>10</sub>-transformed hair manganese; MnB, blood manganese; BSID-III, Bayley Scales of Infant and Toddler Development, 3rd edition.

**Table S3.** Adjusted associations of prenatal logETU<sub>SG</sub> (µg/L), logMnH (µg/g), and MnB (µg/L) concentrations with BSID-III standardized composite scores at 1 year of age for all children and stratified by child sex (models simultaneously adjusted for all three biomarkers), **using complete cases only**, ISA study.

| Neurodevelopmental outcomes <sup>a</sup> | All children |                  | Boys     |                   | Girls    |                   | <i>P</i> <sub>INT</sub> |
|------------------------------------------|--------------|------------------|----------|-------------------|----------|-------------------|-------------------------|
|                                          | <i>n</i>     | β (95% CI)       | <i>n</i> | β (95% CI)        | <i>n</i> | β (95% CI)        |                         |
| <i>Cognitive</i>                         |              |                  |          |                   |          |                   |                         |
| LogETU <sub>SG</sub>                     | 330          | -1.1 (-5.2, 2.9) | 167      | -1.9 (-7.2, 3.5)  | 163      | -1.4 (-7.8, 5.0)  | 0.62                    |
| LogMnH                                   | 330          | 0.1 (-2.0, 2.3)  | 167      | 2.6 (-0.4, 5.7)   | 163      | -2.5 (-5.7, 0.7)  | 0.02                    |
| MnB                                      | 330          | 0.1 (-0.1, 0.2)  | 167      | 0.1 (-0.1, 0.3)   | 163      | -0.1 (-0.3, 0.2)  | 0.20                    |
| <i>Language</i>                          |              |                  |          |                   |          |                   |                         |
| LogETU <sub>SG</sub>                     | 321          | -0.5 (-3.7, 2.7) | 162      | -0.9 (-5.0, 3.2)  | 159      | -0.3 (-5.2, 4.6)  | 0.93                    |
| LogMnH                                   | 321          | 0.1 (-1.6, 1.7)  | 162      | 1.0 (-1.3, 3.3)   | 159      | -0.3 (-2.8, 2.1)  | 0.43                    |
| MnB                                      | 321          | 0.0 (-0.1, 0.2)  | 162      | -0.0 (-0.2, 0.1)  | 159      | 0.1 (-0.1, 0.3)   | 0.29                    |
| <i>Motor</i>                             |              |                  |          |                   |          |                   |                         |
| LogETU <sub>SG</sub>                     | 313          | -0.0 (-4.1, 4.0) | 155      | 1.3 (-4.2, 6.7)   | 158      | -1.5 (-8.0, 5.0)  | 0.43                    |
| LogMnH                                   | 313          | 0.9 (-1.3, 3.1)  | 155      | 0.1 (-3.0, 3.2)   | 158      | 2.4 (-0.8, 5.6)   | 0.65                    |
| MnB                                      | 313          | 0.0 (-0.1, 0.1)  | 155      | 0.1 (-0.1, 0.3)   | 158      | -0.1 (-0.3, 0.2)  | 0.39                    |
| <i>Socio-emotional</i>                   |              |                  |          |                   |          |                   |                         |
| LogETU <sub>SG</sub>                     | 329          | -4.3 (-9.7, 1.1) | 167      | -0.3 (-7.4, 6.7)  | 162      | -7.9 (-16.5, 0.7) | 0.11                    |
| LogMnH                                   | 329          | -1.9 (-4.8, 0.9) | 167      | -4.9 (-8.8, -0.9) | 162      | 1.1 (-3.2, 5.5)   | 0.08                    |
| MnB                                      | 329          | 0.1 (-0.1, 0.3)  | 167      | 0.1 (-0.2, 0.3)   | 162      | 0.1 (-0.2, 0.4)   | 0.80                    |

Models were adjusted for maternal education, parity, gestational age at birth, and child age, HOME score, location of assessment at 1-year visit, and all three biomarkers of exposure.

*Abbreviations:* *n*, number of samples; LogETU<sub>SG</sub>, log<sub>10</sub>-transformed and specific-gravity adjusted urinary ethylenethiourea; LogMnH, log<sub>10</sub>-transformed hair manganese; MnB, blood manganese; BSID-III, Bayley Scales of Infant and Toddler Development, 3rd edition.

<sup>a</sup>Sample sizes vary between neurodevelopmental domains and with respect to Table 2 because not all infants completed all four BSID-III scales and not all of their mothers contributed urine, hair, and blood samples during pregnancy. For instance, 355 infants completed the administration of the BSID-III cognitive scale, and all of them had a maternal urine sample collected during pregnancy (see Table 2), but only 349 of these infants had maternal hair and blood samples.

**Table S4.** Adjusted associations of prenatal logETU<sub>SG</sub> (μg/L), logMnH (μg/g), and MnB (μg/L) concentrations with BSID-III composite scores at 1 year of age for all children and stratified by child sex (exposures in separate models), ISA study.

| Neurodevelopmental outcomes | All children |                   | Boys     |                   | Girls    |                   | <i>P</i> <sub>INT</sub> |
|-----------------------------|--------------|-------------------|----------|-------------------|----------|-------------------|-------------------------|
|                             | <i>n</i>     | $\beta$ (95% CI)  | <i>n</i> | $\beta$ (95% CI)  | <i>n</i> | $\beta$ (95% CI)  |                         |
| <i>Cognitive</i>            |              |                   |          |                   |          |                   |                         |
| LogETU <sub>SG</sub>        | 355          | -1.3 (-5.0, 2.4)  | 178      | -1.5 (-6.5, 3.4)  | 177      | -1.9 (-7.7, 4.0)  | 0.83                    |
| LogMnH                      | 355          | -0.2 (-2.2, 1.8)  | 178      | 2.2 (-0.5, 4.9)   | 177      | -2.9 (-5.9, 0.1)  | 0.01                    |
| MnB                         | 349          | 0.1 (-0.1, 0.2)   | 174      | 0.1 (-0.1, 0.3)   | 175      | 0.0 (-0.2, 0.2)   | 0.34                    |
| <i>Language</i>             |              |                   |          |                   |          |                   |                         |
| LogETU <sub>SG</sub>        | 346          | -0.8 (-3.8, 2.2)  | 173      | -0.5 (-4.4, 3.3)  | 173      | -0.6 (-5.2, 4.0)  | 0.90                    |
| LogMnH                      | 346          | -0.2 (-1.8, 1.4)  | 173      | 0.5 (-1.6, 2.6)   | 173      | -0.7 (-3.0, 1.7)  | 0.53                    |
| MnB                         | 340          | 0.0 (-0.1, 0.1)   | 169      | 0.0 (-0.2, 0.1)   | 171      | 0.1 (-0.1, 0.3)   | 0.27                    |
| <i>Motor</i>                |              |                   |          |                   |          |                   |                         |
| LogETU <sub>SG</sub>        | 338          | -0.2 (-4.1, 3.7)  | 166      | 0.9 (-4.2, 6.1)   | 172      | -2.1 (-8.1, 4.0)  | 0.37                    |
| LogMnH                      | 338          | 0.5 (-1.6, 2.5)   | 166      | 0.1 (-2.7, 3.0)   | 172      | 1.3 (-1.8, 4.4)   | 0.98                    |
| MnB                         | 332          | 0.0 (-0.1, 0.2)   | 162      | 0.1 (-0.1, 0.3)   | 170      | 0.0 (-0.3, 0.2)   | 0.57                    |
| <i>Socio-emotional</i>      |              |                   |          |                   |          |                   |                         |
| LogETU <sub>SG</sub>        | 352          | -4.7 (-9.7, 0.2)  | 177      | -2.3 (-9.0, 4.3)  | 175      | -7.2 (-14.8, 0.5) | 0.24                    |
| LogMnH                      | 352          | -2.8 (-5.4, -0.2) | 177      | -4.8 (-8.3, -1.2) | 175      | -0.7 (-4.7, 3.3)  | 0.22                    |
| MnB                         | 346          | 0.1 (-0.1, 0.3)   | 173      | 0.1 (-0.1, 0.4)   | 173      | 0.1 (-0.2, 0.4)   | 0.98                    |

Models were adjusted for maternal education, parity, gestational age at birth, and child age, HOME score, and location of assessment at 1-year visit.

*Abbreviations:* *n*, number of participants; LogETU<sub>SG</sub>, log<sub>10</sub>-transformed and specific-gravity adjusted urinary ethylenethiourea; LogMnH, log<sub>10</sub>-transformed hair manganese; MnB, blood manganese; BSID-III, Bayley Scales of Infant and Toddler Development, 3rd edition.

**Table S5.** Adjusted associations of prenatal logETU<sub>SG</sub> (μg/L), logMnH (μg/g), and MnB (μg/L) concentrations with BSID-III subtest **z-scores** at 1 year of age for all children and stratified by child sex (all exposures in the same model), ISA study.

| Neurodevelopmental outcomes | All children |                     | Boys     |                      | Girls    |                      | <i>P</i> <sub>INT</sub> |
|-----------------------------|--------------|---------------------|----------|----------------------|----------|----------------------|-------------------------|
|                             | <i>n</i>     | $\beta$ (95% CI)    | <i>n</i> | $\beta$ (95% CI)     | <i>n</i> | $\beta$ (95% CI)     |                         |
| <i>Cognitive</i>            |              |                     |          |                      |          |                      |                         |
| LogETU <sub>SG</sub>        | 349          | -0.07 (-0.46, 0.32) | 174      | -0.26 (-0.80, 0.28)  | 175      | 0.04 (-0.55, 0.64)   | 0.20                    |
| LogMnH                      | 349          | -0.08 (-0.29, 0.13) | 174      | 0.22 (-0.08, 0.52)   | 175      | -0.40 (-0.70, -0.09) | 0.01                    |
| MnB                         | 349          | 0.01 (-0.01, 0.02)  | 174      | 0.01 (-0.01, 0.03)   | 175      | 0.00 (-0.02, 0.02)   | 0.41                    |
| <i>Receptive language</i>   |              |                     |          |                      |          |                      |                         |
| LogETU <sub>SG</sub>        | 349          | 0.06 (-0.32, 0.43)  | 171      | -0.22 (-0.78, 0.34)  | 172      | 0.40 (-0.11, 0.91)   | 0.19                    |
| LogMnH                      | 349          | 0.02 (-0.18, 0.22)  | 171      | 0.13 (-0.19, 0.44)   | 172      | -0.08 (-0.34, 0.18)  | 0.29                    |
| MnB                         | 343          | 0.01 (-0.01, 0.02)  | 171      | 0.00 (-0.02, 0.02)   | 172      | 0.01 (-0.01, 0.03)   | 0.23                    |
| <i>Expressive language</i>  |              |                     |          |                      |          |                      |                         |
| LogETU <sub>SG</sub>        | 346          | -0.09 (-0.44, 0.27) | 169      | -0.03 (-0.52, 0.46)  | 171      | -0.19 (-0.71, 0.32)  | 0.73                    |
| LogMnH                      | 346          | -0.13 (-0.32, 0.06) | 169      | -0.05 (-0.32, 0.23)  | 171      | -0.19 (-0.45, 0.08)  | 0.65                    |
| MnB                         | 340          | 0.00 (-0.01, 0.01)  | 169      | 0.00 (-0.02, 0.02)   | 171      | 0.00 (-0.02, 0.02)   | 0.90                    |
| <i>Fine motor</i>           |              |                     |          |                      |          |                      |                         |
| LogETU <sub>SG</sub>        | 339          | -0.03 (-0.35, 0.30) | 162      | 0.10 (-0.37, 0.56)   | 171      | -0.14 (-0.60, 0.33)  | 0.41                    |
| LogMnH                      | 339          | 0.04 (-0.13, 0.21)  | 162      | -0.08 (-0.34, 0.18)  | 171      | 0.19 (-0.05, 0.43)   | 0.19                    |
| MnB                         | 333          | 0.00 (-0.01, 0.01)  | 162      | 0.00 (-0.02, 0.02)   | 171      | -0.01 (-0.03, 0.01)  | 0.56                    |
| <i>Gross motor</i>          |              |                     |          |                      |          |                      |                         |
| LogETU <sub>SG</sub>        | 352          | 0.03 (-0.29, 0.35)  | 173      | 0.10 (-0.36, 0.55)   | 173      | -0.11 (-0.58, 0.36)  | 0.62                    |
| LogMnH                      | 352          | -0.01 (-0.19, 0.16) | 173      | 0.11 (-0.14, 0.37)   | 173      | -0.13 (-0.37, 0.11)  | 0.08                    |
| MnB                         | 346          | 0.00 (-0.01, 0.01)  | 173      | 0.01 (-0.01, 0.02)   | 173      | 0.00 (-0.02, 0.02)   | 0.73                    |
| <i>Socio-emotional</i>      |              |                     |          |                      |          |                      |                         |
| LogETU <sub>SG</sub>        | 352          | -0.15 (-0.48, 0.18) | 173      | 0.02 (-0.43, 0.48)   | 173      | -0.28 (-0.78, 0.22)  | 0.21                    |
| LogMnH                      | 352          | -0.15 (-0.32, 0.03) | 173      | -0.31 (-0.57, -0.06) | 173      | 0.02 (-0.23, 0.28)   | 0.13                    |
| MnB                         | 346          | 0.01 (-0.01, 0.02)  | 173      | 0.01 (-0.01, 0.02)   | 173      | 0.00 (-0.02, 0.02)   | 0.95                    |

Models were adjusted for maternal education, parity, gestational age at birth, and child age, HOME score, and location of assessment at 1-year visit.

*Abbreviations:* *n*, number of participants; LogETU<sub>SG</sub>, log<sub>10</sub>-transformed and specific-gravity adjusted urinary ethylenethiourea; LogMnH, log<sub>10</sub>-transformed hair manganese; MnB, blood manganese; BSID-III, Bayley Scales of Infant and Toddler Development, 3rd edition.

**Table S6.** Adjusted associations of prenatal logETU<sub>SG</sub> (µg/L), logMnH (µg/g), MnB (µg/L) concentrations during the **second** half of pregnancy with BSID-III composite scores at 1 year of age stratified by child sex (all exposures in the same model), ISA study.

| Neurodevelopmental outcomes | All children |                  | Boys     |                   | Girls    |                   | <i>p</i> <sub>INT</sub> |
|-----------------------------|--------------|------------------|----------|-------------------|----------|-------------------|-------------------------|
|                             | <i>n</i>     | $\beta$ (95% CI) | <i>n</i> | $\beta$ (95% CI)  | <i>n</i> | $\beta$ (95% CI)  |                         |
| <i>Cognitive</i>            |              |                  |          |                   |          |                   |                         |
| LogETU <sub>SG</sub>        | 280          | -1.6 (-5.6, 2.3) | 145      | -1.1 (-6.4, 4.3)  | 135      | -2.5 (-8.7, 3.7)  | 0.77                    |
| LogMnH                      | 280          | 0.0 (-2.1, 2.2)  | 145      | 2.1 (-0.8, 5.0)   | 135      | -2.3 (-5.7, 1.1)  | 0.05                    |
| MnB                         | 280          | 0.0 (-0.1, 0.2)  | 145      | 0.1 (-0.1, 0.3)   | 135      | -0.1 (-0.3, 0.2)  | 0.20                    |
| <i>Language</i>             |              |                  |          |                   |          |                   |                         |
| LogETU <sub>SG</sub>        | 274          | -0.3 (-3.4, 2.8) | 140      | 0.2 (-3.9, 4.2)   | 134      | -0.5 (-5.3, 4.3)  | 0.60                    |
| LogMnH                      | 274          | 0.9 (-0.7, 2.6)  | 140      | 1.2 (-1.0, 3.4)   | 134      | 1.3 (-1.3, 4.0)   | 0.91                    |
| MnB                         | 274          | 0.0 (-0.1, 0.1)  | 140      | -0.1 (-0.2, 0.1)  | 134      | 0.1 (-0.1, 0.3)   | 0.17                    |
| <i>Motor</i>                |              |                  |          |                   |          |                   |                         |
| LogETU <sub>SG</sub>        | 266          | 0.8 (-3.1, 4.7)  | 133      | 0.8 (-4.6, 6.3)   | 133      | 1.2 (-4.6, 7.1)   | 0.74                    |
| LogMnH                      | 266          | -0.1 (-2.3, 2.0) | 133      | -0.2 (-3.2, 2.8)  | 133      | 0.1 (-3.1, 3.3)   | 0.74                    |
| MnB                         | 266          | 0.1 (-0.1, 0.2)  | 133      | 0.1 (-0.1, 0.3)   | 133      | 0.1 (-0.2, 0.3)   | 0.90                    |
| <i>Socio-emotional</i>      |              |                  |          |                   |          |                   |                         |
| LogETU <sub>SG</sub>        | 279          | -3.7 (-8.8, 1.5) | 145      | -2.9 (-9.7, 3.9)  | 134      | -2.7 (-10.9, 5.6) | 0.87                    |
| LogMnH                      | 279          | -2.0 (-4.8, 0.8) | 145      | -3.9 (-7.6, -0.2) | 134      | -0.3 (-4.8, 4.3)  | 0.30                    |
| MnB                         | 279          | 0.2 (0.0, 0.4)   | 145      | 0.2 (-0.1, 0.5)   | 134      | 0.2 (-0.2, 0.5)   | 0.86                    |

Models were adjusted for maternal education, parity, gestational age at birth, and child age, HOME score, and location of assessment at 1-year visit.

*Abbreviations:* *n*, number of participants; LogETU<sub>SG</sub>, log<sub>10</sub>-transformed and specific-gravity adjusted urinary ethylenethiourea; LogMnH, log<sub>10</sub>-transformed hair manganese; MnB, blood manganese; BSID-III, Bayley Scales of Infant and Toddler Development, 3rd edition.



**Table S7.** Adjusted associations of prenatal logETU<sub>SG</sub> (µg/L), logMnH (µg/g), and MnB (µg/L) concentrations during the **first** half of pregnancy with BSID-III composite scores at 1 year of age for all children and stratified by child sex (all exposures in the same model), ISA study.

| Neurodevelopmental outcomes | All children |                    | Boys     |                   | Girls    |                   | <i>P</i> <sub>INT</sub> |
|-----------------------------|--------------|--------------------|----------|-------------------|----------|-------------------|-------------------------|
|                             | <i>n</i>     | $\beta$ (95% CI)   | <i>n</i> | $\beta$ (95% CI)  | <i>n</i> | $\beta$ (95% CI)  |                         |
| <i>Cognitive</i>            |              |                    |          |                   |          |                   |                         |
| LogETU <sub>SG</sub>        | 161          | -2.2 (-7.2, 2.8)   | 77       | -3.9 (-11.0, 3.2) | 84       | 1.2 (-6.6, 9.0)   | 0.20                    |
| LogMnH                      | 161          | -0.3 (-2.9, 2.4)   | 77       | -0.2 (-4.5, 4.1)  | 84       | -0.7 (-4.4, 3.1)  | 0.82                    |
| MnB                         | 161          | 0.1 (-0.1, 0.3)    | 77       | 0.1 (-0.2, 0.4)   | 84       | 0.2 (-0.2, 0.5)   | 0.66                    |
| <i>Language</i>             |              |                    |          |                   |          |                   |                         |
| LogETU <sub>SG</sub>        | 158          | -1.3 (-5.0, 2.3)   | 76       | -1.6 (-6.8, 3.7)  | 82       | -1.8 (-7.2, 3.6)  | 0.82                    |
| LogMnH                      | 158          | 0.0 (-2.0, 1.9)    | 76       | 0.3 (-2.9, 3.4)   | 82       | 0.2 (-2.4, 2.8)   | 0.67                    |
| MnB                         | 158          | 0.0 (-0.1, 0.2)    | 76       | 0.1 (-0.2, 0.3)   | 82       | 0.0 (-0.2, 0.3)   | 0.78                    |
| <i>Motor</i>                |              |                    |          |                   |          |                   |                         |
| LogETU <sub>SG</sub>        | 154          | -5.4 (-10.6, -0.1) | 72       | -4.9 (-12.2, 2.4) | 82       | -5.3 (-13.4, 2.7) | 0.81                    |
| LogMnH                      | 154          | 3.6 (0.8, 6.4)     | 72       | 1.2 (-3.3, 5.7)   | 82       | 5.8 (1.9, 9.6)    | 0.32                    |
| MnB                         | 154          | -0.2 (-0.4, 0.1)   | 72       | -0.1 (-0.4, 0.2)  | 82       | -0.3 (-0.7, 0.1)  | 0.68                    |
| <i>Socio-emotional</i>      |              |                    |          |                   |          |                   |                         |
| LogETU <sub>SG</sub>        | 159          | -2.8 (-9.9, 4.4)   | 76       | 2.8 (-6.5, 12.0)  | 83       | -8.6 (-20.5, 3.3) | 0.07                    |
| LogMnH                      | 159          | -1.2 (-5.1, 2.6)   | 76       | -2.5 (-8.1, 3.1)  | 83       | -0.6 (-6.4, 5.1)  | 0.75                    |
| MnB                         | 159          | 0.1 (-0.2, 0.4)    | 76       | 0.0 (-0.4, 0.4)   | 83       | 0.0 (-0.5, 0.6)   | 0.69                    |

Models were adjusted for maternal education, parity, gestational age at birth, and child age, HOME z-scores, and location of assessment at 1-year visit.

*Abbreviations:* *n*, number of participants; LogETU<sub>SG</sub>, log<sub>10</sub>-transformed and specific-gravity adjusted urinary ethylenethiourea; LogMnH, log<sub>10</sub>-transformed hair manganese; MnB, blood manganese; BSID-III, Bayley Scales of Infant and Toddler Development, 3rd edition.

**Table S8.** Adjusted associations of prenatal logETU<sub>SG</sub> (µg/L), logMnH (µg/g), and MnB (µg/L) concentrations with BSID-III standardized composite scores at 1 year of age for all children and stratified by child sex (all exposures in the same model), **with additional adjustment for prenatal lead concentrations**, ISA study.

| Neurodevelopmental outcomes <sup>a</sup> | All children |                  | Boys |                   | Girls |                   | P <sub>INT</sub> |
|------------------------------------------|--------------|------------------|------|-------------------|-------|-------------------|------------------|
|                                          | n            | β (95% CI)       | n    | β (95% CI)        | n     | β (95% CI)        |                  |
| <i>Cognitive</i>                         |              |                  |      |                   |       |                   |                  |
| LogETU <sub>SG</sub>                     | 349          | -1.1 (-4.9, 2.8) | 174  | -1.7 (-7.0, 3.6)  | 175   | -1.2 (-7.2, 4.9)  | 0.60             |
| LogMnH                                   | 349          | -0.2 (-2.3, 1.8) | 174  | 2.5 (-0.5, 5.4)   | 175   | -3.1 (-6.2, 0.0)  | 0.01             |
| MnB                                      | 349          | 0.1 (-0.1, 0.2)  | 174  | 0.1 (-0.1, 0.3)   | 175   | 0.0 (-0.2, 0.2)   | 0.33             |
| <i>Language</i>                          |              |                  |      |                   |       |                   |                  |
| LogETU <sub>SG</sub>                     | 340          | -0.6 (-3.7, 2.5) | 169  | -1.2 (-5.4, 3.1)  | 171   | 0.2 (-4.4, 4.9)   | 0.79             |
| LogMnH                                   | 340          | -0.0 (-1.7, 1.6) | 169  | 0.7 (-1.6, 3.1)   | 171   | -0.6 (-3.0, 1.8)  | 0.47             |
| MnB                                      | 340          | 0.0 (-0.1, 0.1)  | 169  | -0.0 (-0.2, 0.1)  | 171   | 0.1 (-0.1, 0.3)   | 0.27             |
| <i>Motor</i>                             |              |                  |      |                   |       |                   |                  |
| LogETU <sub>SG</sub>                     | 332          | -0.2 (-4.2, 3.8) | 162  | 1.9 (-3.6, 7.4)   | 170   | -2.5 (-8.7, 3.8)  | 0.28             |
| LogMnH                                   | 332          | 0.6 (-1.6, 2.7)  | 162  | 0.1 (-3.0, 3.1)   | 170   | 1.4 (-1.8, 4.6)   | 0.92             |
| MnB                                      | 332          | 0.0 (-0.1, 0.2)  | 162  | 0.1 (-0.1, 0.3)   | 170   | 0.0 (-0.3, 0.2)   | 0.56             |
| <i>Socio-emotional</i>                   |              |                  |      |                   |       |                   |                  |
| LogETU <sub>SG</sub>                     | 346          | -3.9 (-9.1, 1.2) | 173  | 0.0 (-7.1, 7.1)   | 173   | -7.8 (-15.8, 0.1) | 0.10             |
| LogMnH                                   | 346          | -2.3 (-5.0, 0.5) | 173  | -4.6 (-8.5, -0.7) | 173   | -0.1 (-4.1, 4.0)  | 0.17             |
| MnB                                      | 346          | 0.1 (-0.1, 0.3)  | 173  | 0.1 (-0.2, 0.4)   | 173   | 0.1 (-0.2, 0.4)   | 0.88             |

Models were adjusted for maternal education, parity, gestational age at birth, prenatal blood lead concentrations, and child age, HOME score, location of assessment at 1-year visit, and all three biomarkers of exposure.

*Abbreviations:* n, number of samples; LogETU<sub>SG</sub>, log<sub>10</sub>-transformed and specific-gravity adjusted urinary ethylenethiourea; LogMnH, log<sub>10</sub>-transformed hair manganese; MnB, blood manganese; BSID-III, Bayley Scales of Infant and Toddler Development, 3rd edition.

<sup>a</sup>Sample sizes vary between neurodevelopmental domains and with respect to Table 2 because not all infants completed all four BSID-III scales and not all of their mothers contributed urine, hair, and blood samples during pregnancy. For instance, 355 infants completed the administration of the BSID-III cognitive scale, and all of them had a maternal urine sample collected during pregnancy (see Table 2), but only 349 of these infants had maternal hair and blood samples.

Bovs

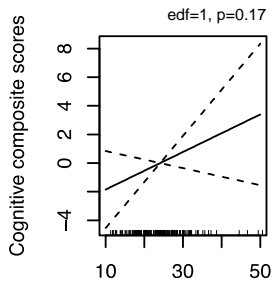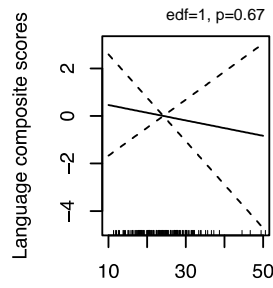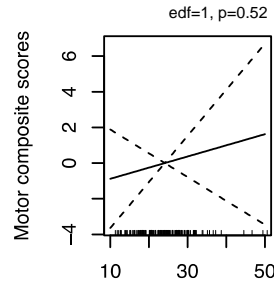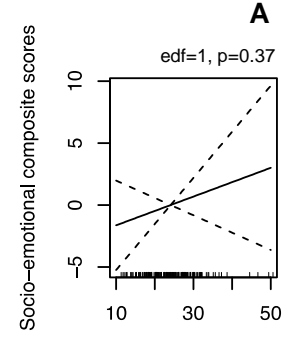

**A**

Girls

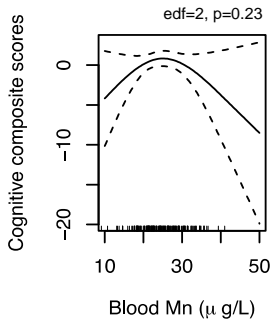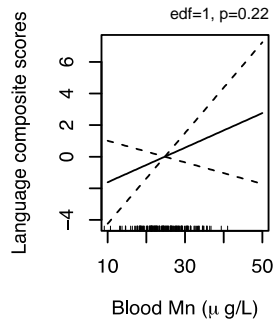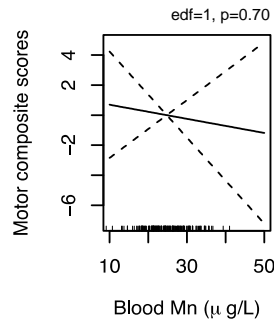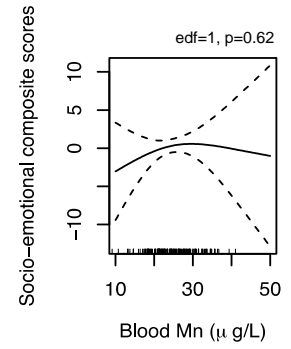

Bovs

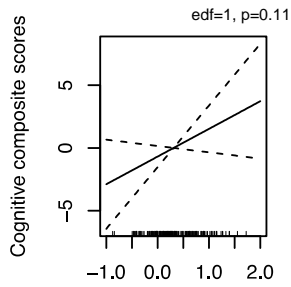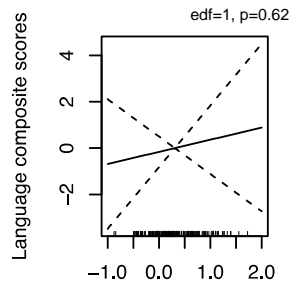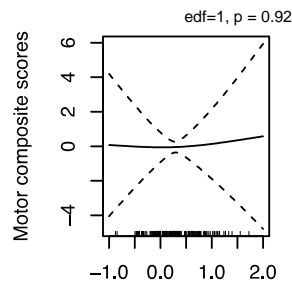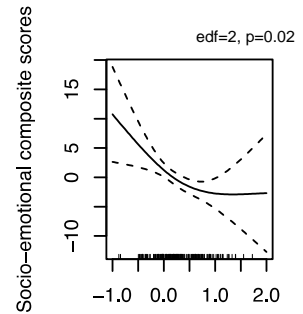

**B**

Girls

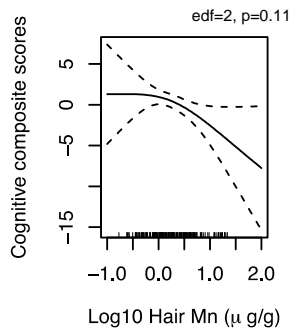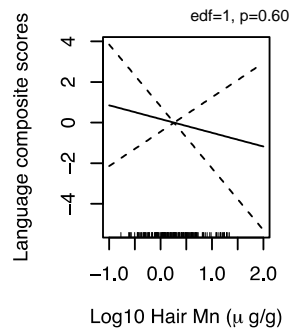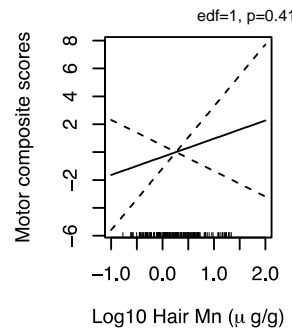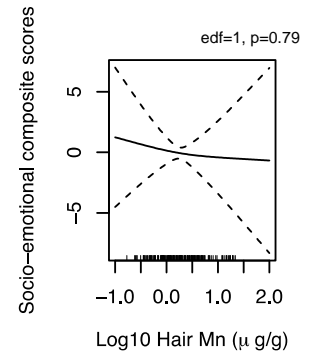

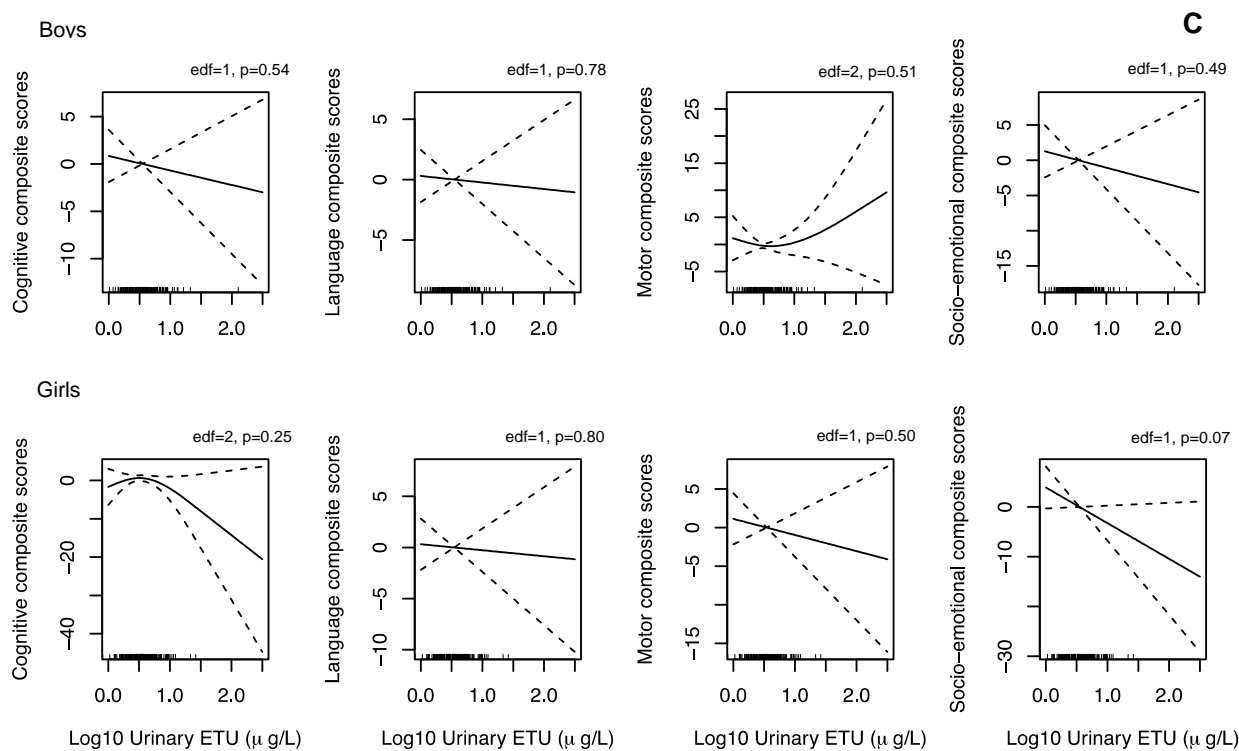

**Figure S1.** Smoothed associations of prenatal mancozeb exposure and excess Mn with child neurodevelopment. Generalized additive models were fit using penalized splines with smoothing parameters estimated by generalized cross-validation [*gam()* function in the R package *mgcv*]. Models were stratified by child sex, and adjusted simultaneously for prenatal  $\log_{10}$ -transformed and specific-gravity adjusted urinary ETU,  $\log_{10}$ -transformed hair Mn, blood Mn concentrations, maternal education, parity, gestational age at birth, and child age, HOME score, and location of assessment at 1-year visit. (A) Prenatal blood manganese; (B) prenatal  $\log_{10}$ -transformed hair Mn; (C) prenatal  $\log_{10}$ -transformed and specific-gravity adjusted urinary ETU. *p*-values correspond to smoothed splines (i.e., exposure-outcome associations). *Abbreviations:* edf, estimated degrees of freedom; ETU, ethylenethiourea; Mn, manganese.

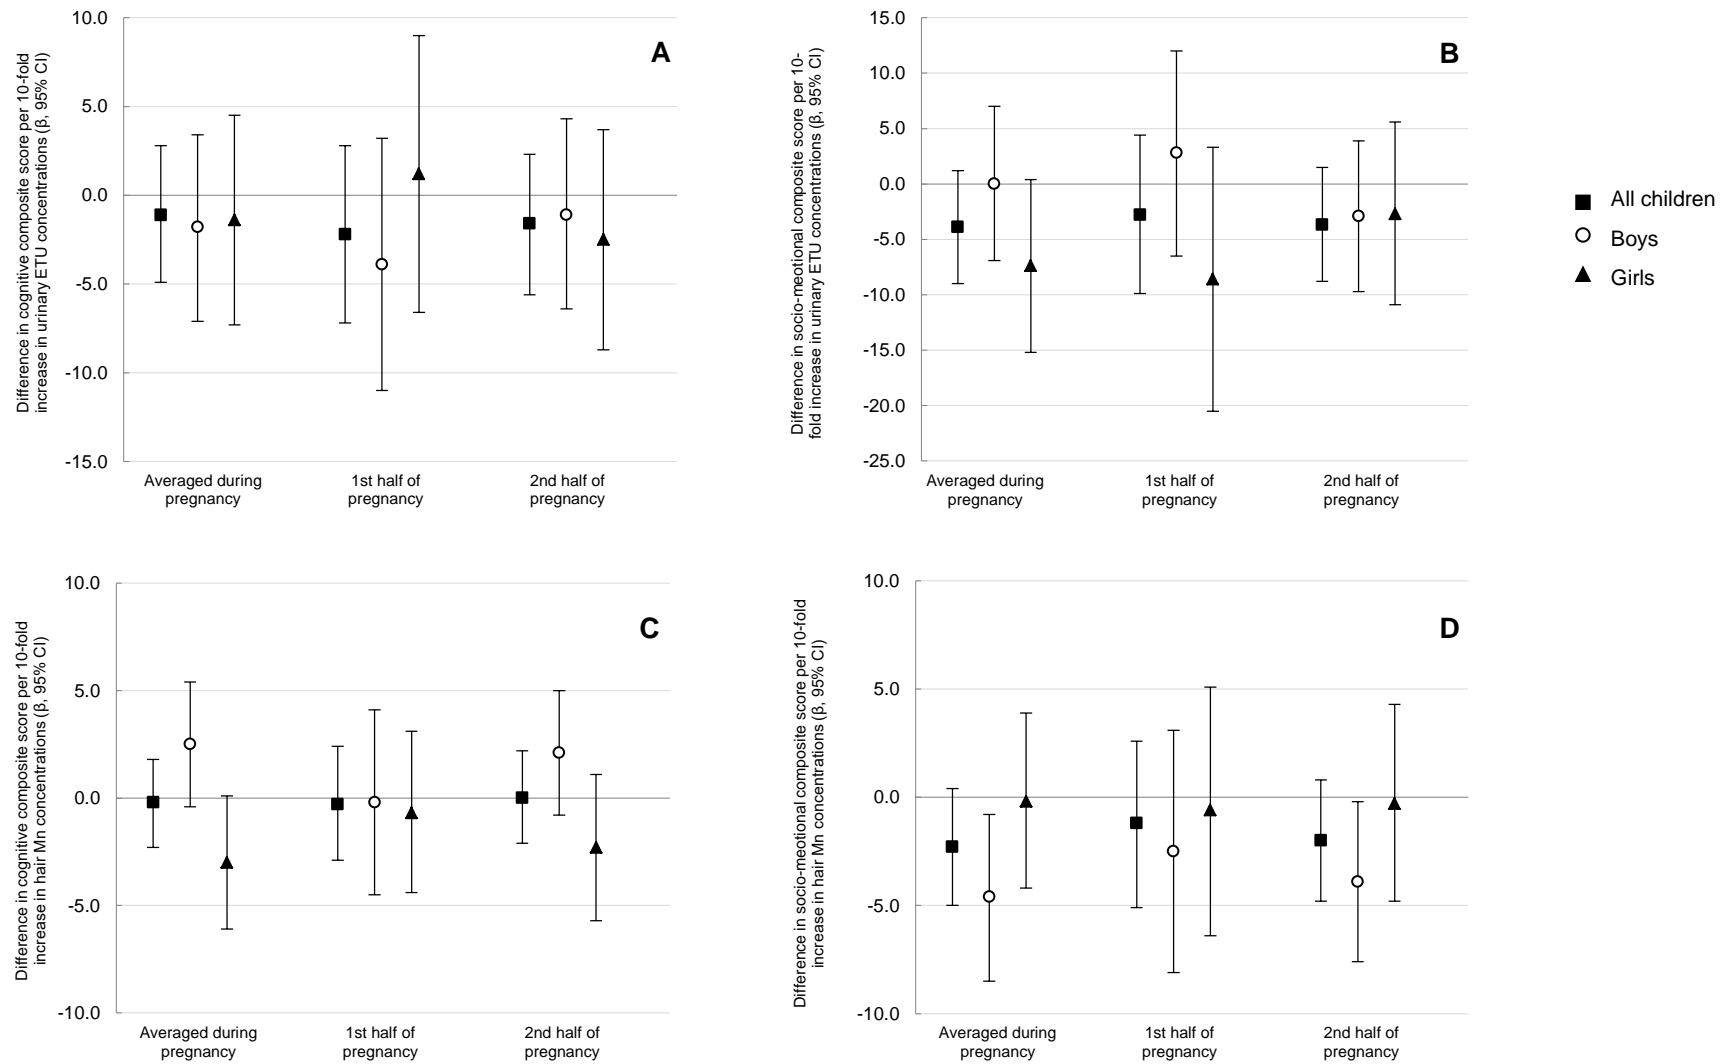

**Figure S2.** Adjusted associations of prenatal mancozeb exposure and excess Mn during pregnancy and by halves of pregnancy with child neurodevelopment. Models were stratified by child sex and adjusted simultaneously for prenatal log<sub>10</sub>-transformed and specific-gravity adjusted urinary ETU, log<sub>10</sub>-transformed hair Mn, blood Mn concentrations, maternal education, parity, gestational age at birth, and child age, HOME score, and location of assessment at 1-year visit. (A) Prenatal log<sub>10</sub> urinary ETU with cognitive composite scores; (B) prenatal log<sub>10</sub> urinary ETU with socio-emotional composite scores; (C) prenatal log<sub>10</sub>-transformed hair Mn with cognitive composite scores; and (D) prenatal log<sub>10</sub>-transformed hair Mn with socio-emotional composite scores. *Abbreviations:* ETU, ethylenethiourea; Mn, manganese.
